# Supplementary material for: Exploration of the immune cell infiltration-related gene signature in the prognosis of melanoma
Source: publisher site journal article supplement (doi:10.18632/aging.202279), 2021-01-10
Supplement: Supplementary file [file aging-v13i3-202279-supplementary-material-SD1.pdf]

## SUPPLEMENTARY FIGURES

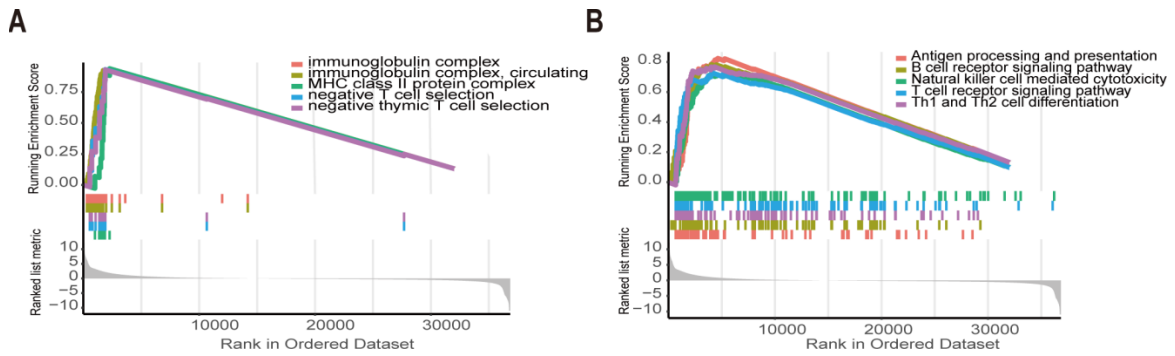

**Supplementary Figure 1. GSEA analysis comparing the immune phenotype between the two immune-related groups. (A, B)** In high immune cell infiltration group, (A) the significant enrichment of top 5 GO terms, and (B) the significant enrichment of 5 immune-related KEGG pathways.

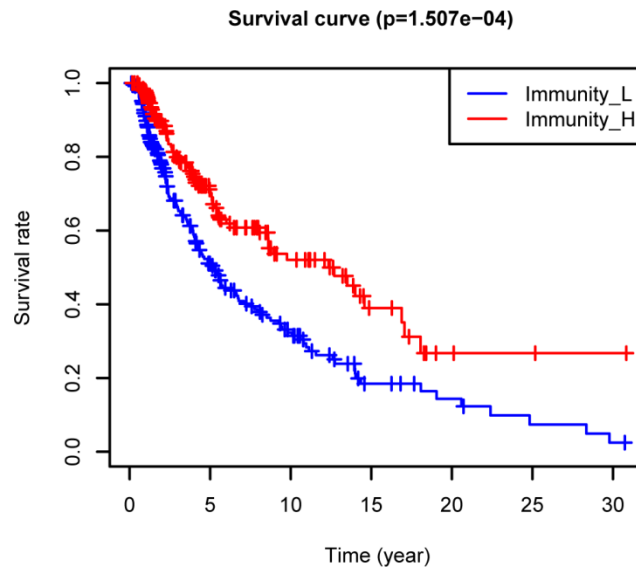

**Supplementary Figure 2. Association between two immune-related groups and OS for melanoma patients.**



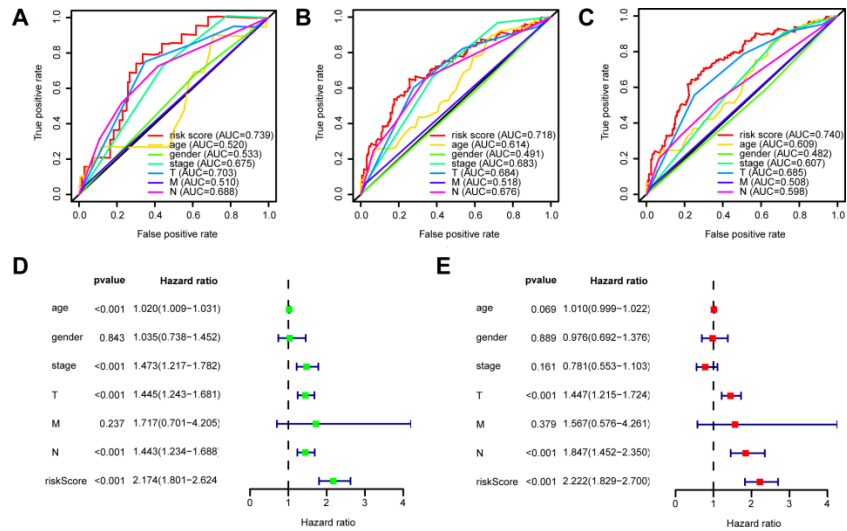

**Supplementary Figure 5. Assessment of the independent prognostic value of the prognostic signature.** The (A) 1-year ROC curves, (B) 3-year ROC curves, and (C) 5-years ROC curves for the signature and clinical features. (D) The univariate Cox regression analysis. (E) The multivariate Cox regression analysis.

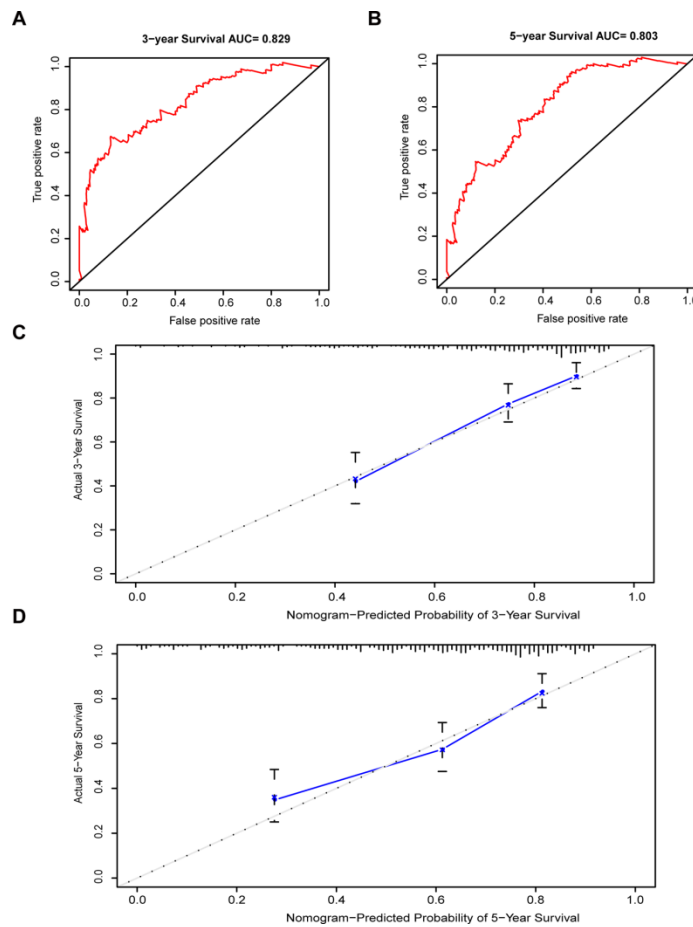

**Supplementary Figure 6. Evaluation of the OS nomogram.** (A, B) The (A) 3-year and (B) 5-year ROC curves. (C, D) The calibration curves for the probability of (C) 3-year and (D) 5-year OS.

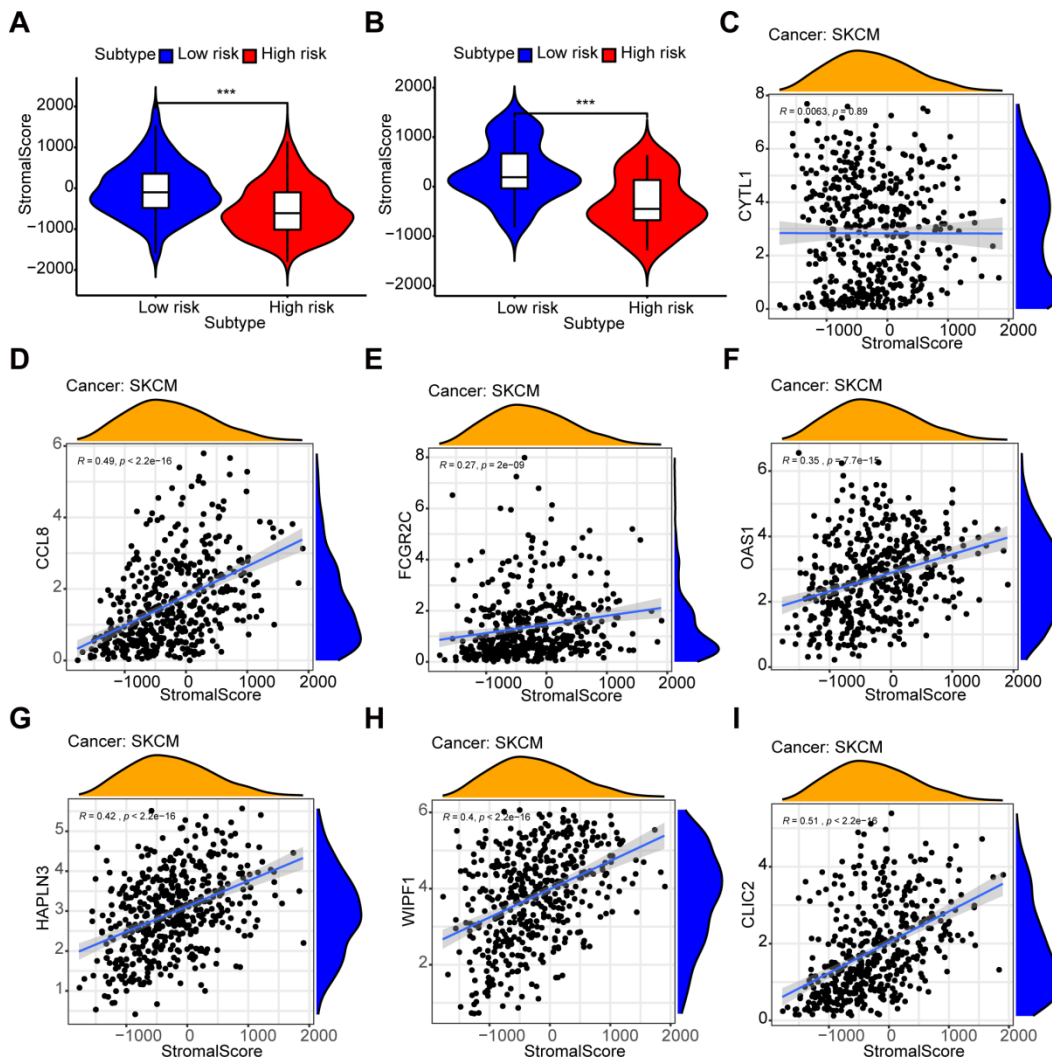

**Supplementary Figure 7. Relationship between the prognostic signature and stromal score.** (A, B) The high-risk group has lower stromal scores compared with the low-risk group in (A) the TCGA dataset and (B) GSE54467. (C–I) The association between stromal score and the expression of each gene in the 7-gene prognostic signature: (C) CYTL1, (D) CCL8, (E) FCGR2C, (F) OAS1, (G) HAPLN3, (H) WIPF1, (I) CLIC2.

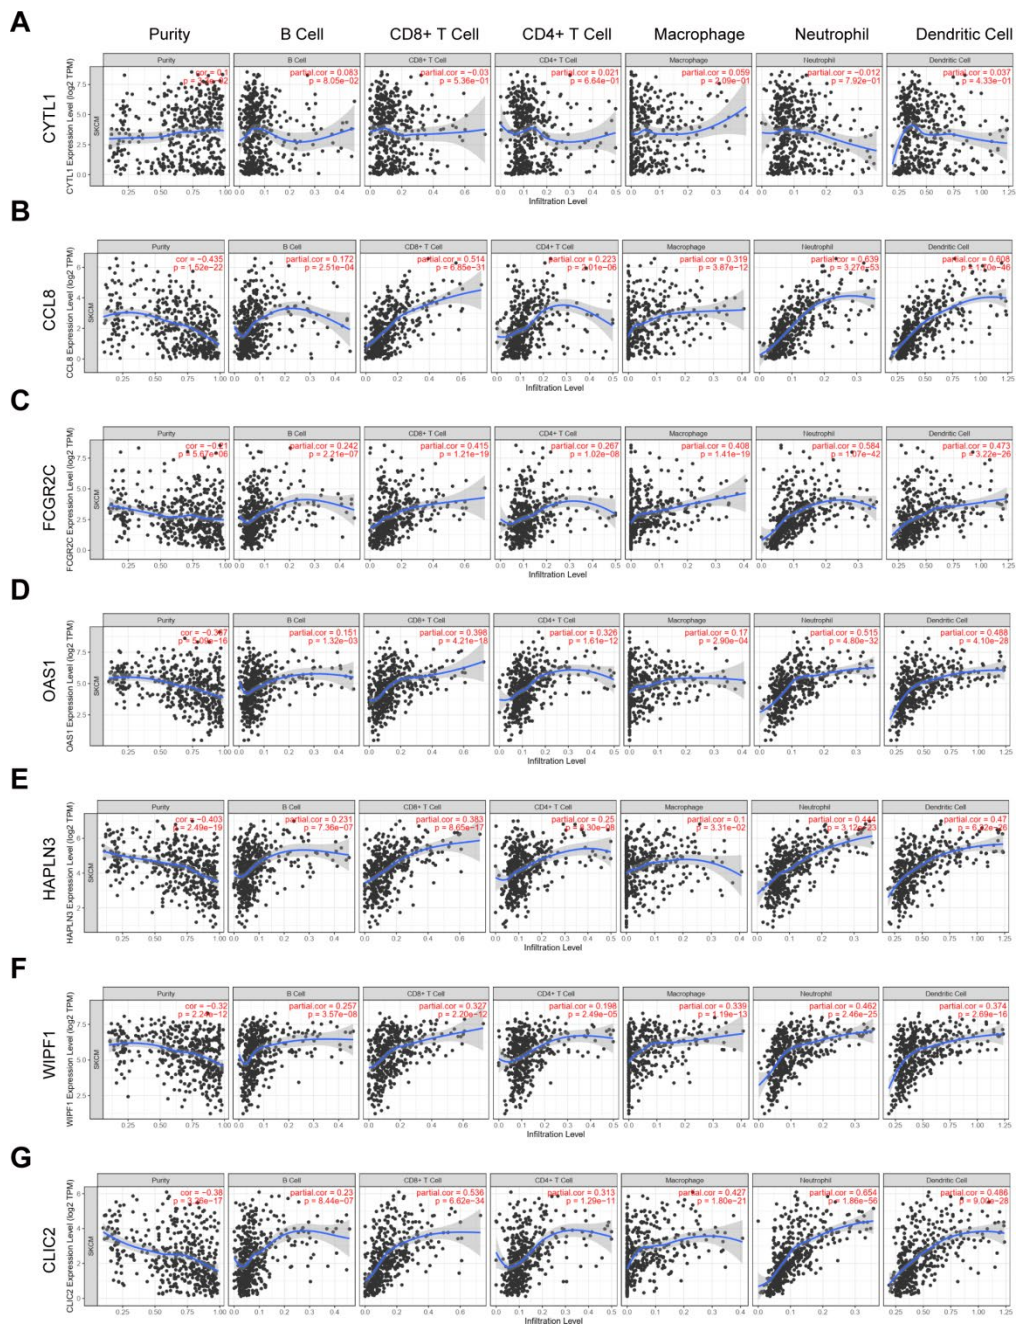

**Supplementary Figure 8. Association between the gene expression level and six subtypes of TIICs. (A) CYTL1, (B) CCL8, (C) FCGR2C, (D) OAS1, (E) HAPLN3, (F) WIPF1, (G) CLIC2.**
