# Supplementary material for: Exploration of the immune cell infiltration-related gene signature in the prognosis of melanoma
Source: Aging (Albany NY). 2021 Jan 10;13(3):3459–82. doi: 10.18632/aging.202279 (PMC7906183; doi:10.18632/aging.202279)
Supplement: Supplementary Table 1 [file aging-13-202279-s002.docx]

| **Supplementary Table 1. Kaplan-Meier survival analysis.** | | | | |
| --- | --- | --- | --- | --- |
| **Number** | **Gene** | **TCGA (p-value)** |  | |
| | 1 | | --- | | 2 | | 3 | | 4 | | 5 | | 6 | | 7 | | 8 | | 9 | | 10 | | 11 | | 12 | | 13 | | 14 | | 15 | | 16 | | 17 | | 18 | | 19 | | 20 | | 21 | | 22 | | 23 | | 24 | | 25 | | 26 | | 27 | | 28 | | 29 | | 30 | | 31 | | 32 | | 33 | | 34 | | 35 | | 36 | | 37 | | 38 | | 39 | | 40 | | 41 | | 42 | | 43 | | 44 | | 45 | | 46 | | 47 | | 48 | | 49 | | 50 | | 51 | | 52 | | 53 | | 54 | | 55 | | 56 | | 57 | | 58 | | 59 | | 60 | | 61 | | 62 | | 63 | | 64 | | 65 | | 66 | | 67 | | 68 | | 69 | | 70 | | 71 | | 72 | | 73 | | 74 | | 75 | | 76 | | 77 | | 78 | | 79 | | 80 | | 81 | | 82 | | 83 | | 84 | | 85 | | 86 | | 87 | | 88 | | 89 | | 90 | | 91 | | 92 | | 93 | | 94 | | 95 | | 96 | | 97 | | 98 | | 99 | | 100 | | 101 | | 102 | | 103 | | 104 | | 105 | | 106 | | 107 | | 108 | | 109 | | 110 | | 111 | | 112 | | 113 | | 114 | | 115 | | 116 | | 117 | | 118 | | 119 | | 120 | | 121 | | 122 | | 123 | | 124 | | 125 | | 126 | | 127 | | 128 | | 129 | | 130 | | 131 | | 132 | | 133 | | 134 | | 135 | | 136 | | 137 | | 138 | | 139 | | 140 | | 141 | | 142 | | 143 | | 144 | | 145 | | 146 | | 147 | | 148 | | 149 | | 150 | | 151 | | 152 | | 153 | | 154 | | 155 | | 156 | | 157 | | 158 | | 159 | | 160 | | 161 | | 162 | | 163 | | 164 | | 165 | | 166 | | 167 | | 168 | | 169 | | 170 | | 171 | | 172 | | 173 | | 174 | | 175 | | 176 | | 177 | | 178 | | 179 | | 180 | | 181 | | 182 | | 183 | | 184 | | 185 | | 186 | | 187 | | 188 | | 189 | | 190 | | 191 | | 192 | | 193 | | 194 | | 195 | | 196 | | 197 | | 198 | | 199 | | 200 | | 201 | | 202 | | 203 | | 204 | | 205 | | 206 | | 207 | | 208 | | 209 | | 210 | | 211 | | 212 | | 213 | | 214 | | 215 | | 216 | | 217 | | 218 | | 219 | | 220 | | 221 | | 222 | | 223 | | 224 | | 225 | | 226 | | 227 | | 228 | | 229 | | 230 | | 231 | | 232 | | 233 | | 234 | | 235 | | 236 | | 237 | | 238 | | 239 | | 240 | | 241 | | 242 | | 243 | | 244 | | 245 | | 246 | | 247 | | 248 | | 249 | | 250 | | 251 | | 252 | | 253 | | 254 | | 255 | | 256 | | 257 | | 258 | | 259 | | 260 | | 261 | | 262 | | 263 | | 264 | | 265 | | 266 | | 267 | | 268 | | 269 | | 270 | | 271 | | 272 | | 273 | | 274 | | 275 | | 276 | | 277 | | 278 | | 279 | | 280 | | 281 | | 282 | | 283 | | 284 | | 285 | | 286 | | 287 | | 288 | | 289 | | 290 | | 291 | | 292 | | 293 | | 294 | | 295 | | 296 | | 297 | | 298 | | 299 | | 300 | | 301 | | 302 | | 303 | | 304 | | 305 | | 306 | | 307 | | 308 | | 309 | | 310 | | 311 | | 312 | | 313 | | 314 | | 315 | | 316 | | 317 | | 318 | | 319 | | 320 | | 321 | | 322 | | 323 | | 324 | | 325 | | 326 | | 327 | | 328 | | 329 | | 330 | | 331 | | 332 | | 333 | | 334 | | 335 | | 336 | | 337 | | 338 | | 339 | | 340 | | 341 | | 342 | | 343 | | 344 | | 345 | | 346 | | 347 | | 348 | | 349 | | 350 | | 351 | | 352 | | 353 | | 354 | | 355 | | 356 | | 357 | | 358 | | 359 | | 360 | | 361 | | 362 | | 363 | | 364 | | 365 | | 366 | | 367 | | 368 | | 369 | | 370 | | 371 | | 372 | | 373 | | 374 | | 375 | | 376 | | 377 | | 378 | | 379 | | 380 | | 381 | | 382 | | 383 | | 384 | | 385 | | 386 | | 387 | | 388 | | 389 | | 390 | | 391 | | 392 | | 393 | | 394 | | 395 | | 396 | | 397 | | 398 | | 399 | | 400 | | 401 | | 402 | | 403 | | 404 | | 405 | | 406 | | 407 | | 408 | | 409 | | 410 | | 411 | | 412 | | 413 | | 414 | | 415 | | 416 | | 417 | | 418 | | 419 | | 420 | | 421 | | 422 | | 423 | | 424 | | 425 | | 426 | | 427 | | 428 | | 429 | | 430 | | 431 | | 432 | | 433 | | 434 | | 435 | | 436 | | 437 | | 438 | | 439 | | 440 | | 441 | | 442 | | 443 | | 444 | | 445 | | 446 | | 447 | | 448 | | 449 | | 450 | | 451 | | 452 | | 453 | | 454 | | 455 | | 456 | | 457 | | 458 | | 459 | | 460 | | 461 | | 462 | | 463 | | 464 | | 465 | | 466 | | 467 | | 468 | | 469 | | 470 | | 471 | | 472 | | 473 | | 474 | | 475 | | 476 | | 477 | | 478 | | 479 | | 480 | | 481 | | 482 | | 483 | | 484 | | 485 | | 486 | | 487 | | 488 | | 489 | | 490 | | 491 | | 492 | | 493 | | 494 | | 495 | | 496 | | 497 | | 498 | | 499 | | 500 | | 501 | | 502 | | 503 | | 504 | | 505 | | 506 | | 507 | | 508 | | 509 | | | GBP2 | | --- | | GBP5 | | EAF2 | | APOBEC3G | | SIGLEC10 | | STAT1 | | FCGR2C | | OAS1 | | SEMA4D | | PARP12 | | TRIM22 | | IRF1 | | IFITM1 | | HAPLN3 | | SAMD9L | | CD86 | | PARP9 | | APOL6 | | CCL8 | | BIRC3 | | IL21R | | TIMD4 | | GBP4 | | APOL1 | | PTPN7 | | TLR2 | | FCGR2A | | FGL2 | | RARRES3 | | HLA-DPA1 | | LAT2 | | GCH1 | | TNFRSF9 | | IL2RA | | FCRL3 | | SH2D1A | | MS4A6A | | NCF1 | | LAP3 | | IFI44L | | PARP15 | | C3AR1 | | CXCL11 | | HLA-DOA | | ARHGAP9 | | SOD2 | | HLA-DQA1 | | HLA-DOB | | CD38 | | BST2 | | SLC7A7 | | ARID5A | | GIMAP7 | | PTPN22 | | TNFSF10 | | NR1H3 | | LST1 | | SRGN | | CD274 | | P2RY10 | | CLEC7A | | HAVCR2 | | MNDA | | HLA-DRA | | HLA-DMB | | PTPRC | | TLR8 | | PLA2G2D | | PARP14 | | TRAF3IP3 | | SP140 | | IL2RG | | CCR1 | | SIT1 | | PDCD1LG2 | | HLA-DPB1 | | IRF2 | | HLA-DRB1 | | NCF1C | | IL15RA | | IFNG | | EVI2B | | IL4I1 | | PTPN6 | | GBP1 | | NMI | | CSF1 | | ALOX5 | | TLR10 | | HLA-DQB1 | | CD74 | | GZMB | | CXCL10 | | FASLG | | NKG7 | | CTSS | | SPOCK2 | | ARHGAP30 | | SIRPG | | APOL2 | | CSF1R | | APOL3 | | ARHGAP25 | | HLA-B | | UBE2L6 | | SLAMF8 | | LILRB2 | | LCP2 | | VNN2 | | TMSB4X | | CD72 | | MYO1F | | VAV1 | | TMEM176B | | HCLS1 | | LILRB1 | | CD8A | | TNFSF13B | | PARVG | | SERPINA1 | | CARD11 | | SLA | | CD8B | | B2M | | SPN | | CD7 | | LAPTM5 | | LILRB4 | | ALOX5AP | | OASL | | NCF1B | | LAIR1 | | RCSD1 | | AIF1 | | IFIT3 | | DOCK2 | | LAX1 | | IKZF3 | | LAG3 | | CXCL9 | | IFIH1 | | CD53 | | TNFRSF17 | | PSMB9 | | CCR2 | | SPI1 | | WAS | | GZMA | | INPP5D | | CIITA | | APBB1IP | | RSAD2 | | TAPBP | | IL18 | | CXCR6 | | PILRA | | SLA2 | | TAGAP | | LTA | | LYZ | | BTN3A1 | | CD5 | | RASGRP1 | | PYHIN1 | | PRF1 | | CD3D | | TRIM69 | | CD69 | | DHRS3 | | CXCR3 | | SLAMF6 | | CLEC4A | | CD247 | | CCR5 | | IL18BP | | HSH2D | | RASSF4 | | WIPF1 | | CD84 | | LRMP | | AOAH | | CD3G | | AIM2 | | POU2AF1 | | PIM2 | | GIMAP2 | | CD28 | | GZMK | | GIMAP1 | | FCGR1A | | CYBB | | OAS2 | | HSD11B1 | | POU2F2 | | RNASE6 | | GMFG | | BTN3A3 | | GNLY | | VAMP5 | | GIMAP4 | | TYROBP | | CD3E | | IL2RB | | ITGAL | | PSTPIP1 | | CXCL13 | | IRF8 | | IL7R | | BANK1 | | ITGAM | | TRAT1 | | MSR1 | | CD79A | | VCAM1 | | CD2 | | CD300LF | | EPSTI1 | | ANKRD22 | | C1QB | | ITGB2 | | HLA-C | | C1QA | | LCK | | FBP1 | | CD300A | | FGD2 | | PIK3AP1 | | IL32 | | RELB | | GIMAP6 | | HLA-DMA | | GZMH | | NAPSB | | SAMSN1 | | TRIM21 | | TBC1D10C | | DTX3L | | UBASH3A | | LCP1 | | WARS | | SKAP1 | | ADAMDEC1 | | TAPBPL | | CCL5 | | PTK2B | | ITM2A | | PTGER4 | | C1QC | | IRF7 | | HCK | | FBXO6 | | CD48 | | CD96 | | LTB | | SELPLG | | OSCAR | | CD163 | | CD14 | | DENND1C | | CCND2 | | CST7 | | TNFRSF18 | | HLA-DQB2 | | HK3 | | HLA-DRB5 | | FPR1 | | PLEK | | CD40 | | CTLA4 | | PSME2 | | HCP5 | | IGSF6 | | PTAFR | | NCF4 | | RASSF5 | | ZBED2 | | CD6 | | SELL | | PDCD1 | | DOK2 | | C2 | | CORO1A | | TRAFD1 | | IL10RA | | RAB37 | | CD4 | | IFI27 | | HLA-E | | TNFAIP8L2 | | NCF2 | | KLRB1 | | RAC2 | | ADAM8 | | MS4A1 | | SLAMF1 | | JSRP1 | | PSME1 | | ABI3 | | CCL2 | | SERPING1 | | DOCK8 | | ICAM1 | | BATF2 | | P2RY13 | | SLAMF7 | | HLA-F | | MFNG | | ICAM3 | | MS4A4A | | CR2 | | VSIG4 | | GBP3 | | P2RY8 | | IL12RB1 | | MPEG1 | | ICOS | | SLC15A3 | | APOL4 | | EVI2A | | CLEC10A | | HLA-DRB6 | | LRRC25 | | FGR | | SYTL3 | | LGALS9 | | FCER1G | | SUSD3 | | BTK | | GIMAP8 | | CD37 | | PSD4 | | PSMB10 | | CLIC2 | | TIMP1 | | TNFRSF4 | | ITK | | BTN3A2 | | PARP10 | | UBD | | HLA-A | | CYTL1 | | TNFRSF1B | | ACSL5 | | HCST | | LY86 | | EBI3 | | ABCG1 | | UNC93B1 | | NCR3 | | STK17B | | IFITM3 | | CD40LG | | RARRES1 | | TAP1 | | RRAS | | BCL3 | | CD19 | | MYO1G | | ARRB2 | | SEMA6A | | CTSW | | RBP5 | | ZAP70 | | MVP | | NFKBIA | | CA6 | | LAMP3 | | TNFAIP8 | | FLI1 | | SLCO2B1 | | MARCO | | RNASET2 | | IFI35 | | FMNL1 | | ISG15 | | FCN1 | | FCER2 | | ETV7 | | GPR18 | | PRDM1 | | SIGLEC8 | | PLEKHO1 | | MAN1A1 | | CD209 | | LGMN | | VPREB3 | | CCDC69 | | TOX | | RASGRP2 | | PLCB2 | | CD52 | | DGKA | | ARHGDIB | | CMKLR1 | | CTSC | | CYFIP2 | | SLC40A1 | | TNFAIP2 | | SOCS1 | | CCR7 | | FAM107B | | CST3 | | LPXN | | CPNE5 | | UCP2 | | IL33 | | TCL1A | | BCAN | | G0S2 | | ARL4C | | CXCL16 | | PSMB8 | | KLHL6 | | CDC42SE2 | | BLK | | IFI44 | | C3 | | LSP1 | | ITGAX | | OPTN | | GATA3 | | LYN | | FGD3 | | MAFB | | CCL3 | | CD5L | | DERL3 | | DENND2D | | ATP2A3 | | SLC29A3 | | CTGF | | HLA-H | | GNA15 | | GALM | | TMC8 | | ARHGAP4 | | JUNB | | BTG2 | | SFTPC | | SH2D2A | | ALDH2 | | MS4A7 | | SIPA1 | | SEMA4A | | PLAC8 | | MRC1 | | CA14 | | STX11 | | UNC13D | | SYK | | GAB2 | | TAP2 | | CD83 | | TSPAN33 | | RGS16 | | AKNA | | SPINT2 | | CD1C | | FOLR2 | | RARRES2 | | C1S | | CNTFR | | CNN2 | | EPHB3 | | SYTL1 | | RPS6KA1 | | GPR132 | | ALOX15B | | TMSB10 | | IL3RA | | LGALS2 | | LIPA | | TREM2 | | APOC1 | | TGM2 | | DYSF | | ITGB7 | | SPIB | | SH2D3C | | IL1B | | GADD45B | | MX1 | | HS3ST2 | | PIM1 | | C7 | | WNK4 | | TCIRG1 | | THBS1 | | C1R | | FOXF2 | | LBH | | CYP1B1 | | IRF5 | | CEBPA | | IFI6 | | TMEM37 | | DEF6 | | ERBB3 | | EDNRB | | VMO1 | | BZW2 | | CASP1 | | BCHE | | MAP4K1 | | OAS3 | | GZMM | | CXCL12 | | RHOG | | C5AR1 | | | 1.07E-08 | | --- | | 2.62E-08 | | 2.88E-08 | | 3.49E-08 | | 4.40E-08 | | 4.83E-08 | | 6.25E-08 | | 8.89E-08 | | 1.04E-07 | | 1.18E-07 | | 1.21E-07 | | 1.35E-07 | | 1.47E-07 | | 1.49E-07 | | 1.51E-07 | | 1.80E-07 | | 2.06E-07 | | 2.08E-07 | | 2.23E-07 | | 2.30E-07 | | 2.70E-07 | | 3.02E-07 | | 3.07E-07 | | 3.87E-07 | | 3.90E-07 | | 3.91E-07 | | 3.94E-07 | | 4.85E-07 | | 5.42E-07 | | 5.72E-07 | | 5.77E-07 | | 6.40E-07 | | 6.43E-07 | | 7.09E-07 | | 7.37E-07 | | 8.55E-07 | | 9.67E-07 | | 9.85E-07 | | 9.89E-07 | | 1.11E-06 | | 1.14E-06 | | 1.15E-06 | | 1.25E-06 | | 1.26E-06 | | 1.34E-06 | | 1.36E-06 | | 1.40E-06 | | 1.47E-06 | | 1.51E-06 | | 1.52E-06 | | 1.55E-06 | | 1.61E-06 | | 1.63E-06 | | 1.65E-06 | | 1.87E-06 | | 1.87E-06 | | 1.93E-06 | | 2.03E-06 | | 2.18E-06 | | 2.23E-06 | | 2.30E-06 | | 2.34E-06 | | 2.37E-06 | | 2.43E-06 | | 2.45E-06 | | 2.49E-06 | | 2.51E-06 | | 2.53E-06 | | 2.58E-06 | | 2.58E-06 | | 2.85E-06 | | 2.89E-06 | | 3.05E-06 | | 3.12E-06 | | 3.19E-06 | | 3.27E-06 | | 3.72E-06 | | 3.89E-06 | | 3.91E-06 | | 4.13E-06 | | 4.19E-06 | | 4.21E-06 | | 4.28E-06 | | 4.40E-06 | | 4.49E-06 | | 4.64E-06 | | 4.82E-06 | | 5.06E-06 | | 5.20E-06 | | 5.21E-06 | | 5.23E-06 | | 5.62E-06 | | 5.82E-06 | | 5.93E-06 | | 6.08E-06 | | 6.39E-06 | | 6.55E-06 | | 6.65E-06 | | 6.67E-06 | | 6.71E-06 | | 6.74E-06 | | 6.78E-06 | | 6.82E-06 | | 7.20E-06 | | 7.20E-06 | | 7.27E-06 | | 7.46E-06 | | 7.75E-06 | | 7.84E-06 | | 7.88E-06 | | 7.95E-06 | | 8.15E-06 | | 8.44E-06 | | 8.64E-06 | | 8.75E-06 | | 8.90E-06 | | 9.04E-06 | | 9.18E-06 | | 9.25E-06 | | 9.43E-06 | | 9.88E-06 | | 1.08E-05 | | 1.09E-05 | | 1.09E-05 | | 1.11E-05 | | 1.15E-05 | | 1.16E-05 | | 1.18E-05 | | 1.21E-05 | | 1.26E-05 | | 1.29E-05 | | 1.30E-05 | | 1.31E-05 | | 1.34E-05 | | 1.39E-05 | | 1.56E-05 | | 1.56E-05 | | 1.59E-05 | | 1.59E-05 | | 1.60E-05 | | 1.60E-05 | | 1.64E-05 | | 1.65E-05 | | 1.68E-05 | | 1.69E-05 | | 1.70E-05 | | 1.76E-05 | | 1.76E-05 | | 1.79E-05 | | 1.86E-05 | | 1.88E-05 | | 1.93E-05 | | 1.93E-05 | | 1.96E-05 | | 2.02E-05 | | 2.03E-05 | | 2.06E-05 | | 2.09E-05 | | 2.12E-05 | | 2.14E-05 | | 2.17E-05 | | 2.21E-05 | | 2.25E-05 | | 2.28E-05 | | 2.30E-05 | | 2.33E-05 | | 2.36E-05 | | 2.40E-05 | | 2.44E-05 | | 2.45E-05 | | 2.46E-05 | | 2.47E-05 | | 2.47E-05 | | 2.63E-05 | | 2.77E-05 | | 2.78E-05 | | 2.83E-05 | | 2.86E-05 | | 2.87E-05 | | 2.91E-05 | | 2.94E-05 | | 3.03E-05 | | 3.03E-05 | | 3.08E-05 | | 3.15E-05 | | 3.23E-05 | | 3.26E-05 | | 3.30E-05 | | 3.32E-05 | | 3.36E-05 | | 3.45E-05 | | 3.49E-05 | | 3.52E-05 | | 3.67E-05 | | 3.82E-05 | | 3.84E-05 | | 3.85E-05 | | 3.88E-05 | | 3.96E-05 | | 4.09E-05 | | 4.10E-05 | | 4.19E-05 | | 4.35E-05 | | 4.40E-05 | | 4.50E-05 | | 4.58E-05 | | 4.68E-05 | | 4.71E-05 | | 4.81E-05 | | 4.90E-05 | | 4.93E-05 | | 5.27E-05 | | 5.28E-05 | | 5.47E-05 | | 5.50E-05 | | 5.65E-05 | | 5.66E-05 | | 5.70E-05 | | 6.03E-05 | | 6.11E-05 | | 6.40E-05 | | 6.41E-05 | | 6.56E-05 | | 6.66E-05 | | 6.77E-05 | | 6.82E-05 | | 6.83E-05 | | 7.10E-05 | | 7.30E-05 | | 7.30E-05 | | 7.36E-05 | | 7.40E-05 | | 7.48E-05 | | 7.50E-05 | | 7.51E-05 | | 7.58E-05 | | 7.85E-05 | | 8.18E-05 | | 8.27E-05 | | 8.28E-05 | | 8.41E-05 | | 8.47E-05 | | 8.50E-05 | | 8.81E-05 | | 9.08E-05 | | 9.30E-05 | | 9.63E-05 | | 9.65E-05 | | 9.89E-05 | | 1.00E-04 | | 0.0001 | | 0.0001 | | 0.000103 | | 0.000106 | | 0.000106 | | 0.00011 | | 0.00011 | | 0.000111 | | 0.000112 | | 0.000119 | | 0.00012 | | 0.000121 | | 0.000123 | | 0.000125 | | 0.000127 | | 0.000127 | | 0.000128 | | 0.000129 | | 0.000129 | | 0.000129 | | 0.000132 | | 0.000137 | | 0.000143 | | 0.000143 | | 0.000146 | | 0.000147 | | 0.000148 | | 0.000149 | | 0.000152 | | 0.00016 | | 0.000163 | | 0.000167 | | 0.00017 | | 0.000178 | | 0.000178 | | 0.000178 | | 0.000178 | | 0.000179 | | 0.000179 | | 0.000183 | | 0.000184 | | 0.000196 | | 0.000204 | | 0.00021 | | 0.000215 | | 0.000218 | | 0.000219 | | 0.000219 | | 0.000229 | | 0.000231 | | 0.00024 | | 0.000243 | | 0.000246 | | 0.000254 | | 0.00027 | | 0.000272 | | 0.000272 | | 0.000274 | | 0.000295 | | 0.000296 | | 0.000298 | | 0.0003 | | 0.000301 | | 0.000303 | | 0.000306 | | 0.000309 | | 0.000318 | | 0.000334 | | 0.000336 | | 0.000347 | | 0.000362 | | 0.000366 | | 0.000375 | | 0.000415 | | 0.00042 | | 0.000422 | | 0.000429 | | 0.000455 | | 0.000471 | | 0.000473 | | 0.000492 | | 0.000494 | | 0.000495 | | 0.000508 | | 0.000539 | | 0.000545 | | 0.00055 | | 0.000573 | | 0.000574 | | 0.000609 | | 0.000653 | | 0.00067 | | 0.000677 | | 0.000696 | | 0.000703 | | 0.000748 | | 0.000803 | | 0.000812 | | 0.00083 | | 0.000832 | | 0.000845 | | 0.000938 | | 0.000942 | | 0.00098 | | 0.001047 | | 0.001059 | | 0.001069 | | 0.001072 | | 0.001193 | | 0.001209 | | 0.001267 | | 0.001286 | | 0.001372 | | 0.001372 | | 0.001499 | | 0.001614 | | 0.001623 | | 0.001626 | | 0.001673 | | 0.001685 | | 0.001778 | | 0.001793 | | 0.001816 | | 0.001884 | | 0.001917 | | 0.001941 | | 0.001957 | | 0.002081 | | 0.00211 | | 0.002144 | | 0.002155 | | 0.002214 | | 0.002471 | | 0.002562 | | 0.002577 | | 0.002631 | | 0.002678 | | 0.002717 | | 0.002823 | | 0.002924 | | 0.003145 | | 0.003223 | | 0.003266 | | 0.003479 | | 0.003705 | | 0.003718 | | 0.003869 | | 0.003954 | | 0.003969 | | 0.004016 | | 0.004248 | | 0.004291 | | 0.004364 | | 0.004423 | | 0.004467 | | 0.004751 | | 0.004811 | | 0.004994 | | 0.005064 | | 0.00507 | | 0.00508 | | 0.005094 | | 0.005161 | | 0.005254 | | 0.005376 | | 0.005385 | | 0.005427 | | 0.005521 | | 0.005534 | | 0.005801 | | 0.005816 | | 0.006031 | | 0.006109 | | 0.006152 | | 0.006537 | | 0.006573 | | 0.006779 | | 0.007071 | | 0.007366 | | 0.007419 | | 0.007707 | | 0.007746 | | 0.008256 | | 0.009061 | | 0.009203 | | 0.009342 | | 0.010128 | | 0.010362 | | 0.010529 | | 0.010722 | | 0.010809 | | 0.011492 | | 0.011848 | | 0.01242 | | 0.012529 | | 0.012587 | | 0.012886 | | 0.012898 | | 0.012923 | | 0.013073 | | 0.014164 | | 0.014639 | | 0.014705 | | 0.015069 | | 0.015097 | | 0.016269 | | 0.016498 | | 0.016841 | | 0.017028 | | 0.018113 | | 0.018411 | | 0.018582 | | 0.020083 | | 0.021352 | | 0.02149 | | 0.021576 | | 0.02252 | | 0.022971 | | 0.023652 | | 0.024033 | | 0.02524 | | 0.02549 | | 0.027343 | | 0.027452 | | 0.028512 | | 0.028634 | | 0.028979 | | 0.02913 | | 0.029397 | | 0.029492 | | 0.029925 | | 0.030239 | | 0.030603 | | 0.030919 | | 0.031281 | | 0.031604 | | 0.031822 | | 0.032064 | | 0.033065 | | 0.033825 | | 0.033864 | | 0.034923 | | 0.035161 | | 0.035344 | | 0.036498 | | 0.036621 | | 0.038004 | | 0.039826 | | 0.040198 | | 0.040382 | | 0.042208 | | 0.042534 | | 0.042838 | | 0.043514 | | 0.043829 | | 0.044201 | | 0.044838 | | 0.045 | | 0.047652 | | |
